# MiR-125b realizes anti-tumor action via PI3K/Akt/GSK3 $\beta$ pathway by targeting PIK3CD in hepatocellular carcinoma

Honglei Che<sup>1,\*</sup>, Xiaodong Jia<sup>2,\*</sup>, Lingzhan Meng<sup>3,\*</sup>, Hu Li<sup>3</sup>, Xiaofeng Zhang<sup>3</sup>, Yunlong Zhuang<sup>3</sup>, Xiaofeng Niu<sup>3</sup>, Yu Zhang<sup>3</sup>, Yinjie Gao<sup>3</sup>, Zhenyu Zhu<sup>3</sup>

<sup>1</sup>Department of Biochemistry, School of Basic Medicine, Shaanxi University of Chinese Medicine, Xianyang 712046, Shaanxi, China

<sup>2</sup>Department of Comprehensive Liver Cancer, The Fifth Medical Center of PLA General Hospital, Beijing 100039, China

<sup>3</sup>Department of Hepatobiliary Surgery, The Fifth Medical Center of PLA General Hospital, Beijing 100039, China

\*Co-first authors

**Correspondence to:** Zhenyu Zhu, Yinjie Gao; email: [eirrubfo@126.com](mailto:eirrubfo@126.com), <https://orcid.org/0000-0001-5344-3161>; [yalusoe@yeah.net](mailto:yalusoe@yeah.net)

**Keywords:** hepatocellular carcinoma, MiR-125b, PI3K/Akt/GSK3 $\beta$ , PIK3CD

**Received:** December 4, 2020

**Accepted:** November 23, 2020

**Published:**

**Copyright:** © 2021 Che et al. This is an open access article distributed under the terms of the [Creative Commons Attribution License](https://creativecommons.org/licenses/by/3.0/) (CC BY 3.0), which permits unrestricted use, distribution, and reproduction in any medium, provided the original author and source are credited.

## ABSTRACT

The present study was designed to investigate the function and mechanisms of *miR-125b* in hepatocellular carcinoma (HCC). The expressions of *miR-125b* in HCC tissues and cells were detected using quantitative real-time polymerase chain reaction (qRT-PCR). Chi-square test was used to analyze the influences of *miR-125b* expression on clinical features of HCC patients. The effects of *miR-125b* expression on cell proliferation, migration and invasion were investigated using MTT and transwell assays, respectively. Protein analysis was performed by western blot. The potential target of *miR-125b* was identified via bioinformatic analysis and luciferase report assay. *MiR-125b* was significantly downregulated in HCC tissues and cells ( $P<0.01$ ). Moreover, its down-regulation was negatively correlated with TNM stage ( $P=0.024$ ) and lymph node metastasis ( $P=0.013$ ). Enhanced expression of *miR-125b* could inhibit HCC cell proliferation, migration and invasion *in vitro*. PIK3CD was confirmed as a target of *miR-125b* in HCC, and its expression was negatively regulated by *miR-125b*. Moreover, PIK3CD could reverse the function of *miR-125b* in HCC. Additionally, *in vivo* experiments proved that *miR-125b* could suppress HCC cell growth. *MiR-125b* may play anti-tumor action in HCC via suppressing PI3K/Akt/GSK3 $\beta$  signaling pathway by targeting PIK3CD.

## INTRODUCTION

Hepatocellular carcinoma (HCC) is one of the most serious primary cancers, and is the fifth common malignant tumor in males and the ninth in females [1, 2]. It is also a leading cause of cancer-related deaths in the world [3, 4]. Even worse, the incidence of HCC is continually increasing and nearly 62 million new HCC cases are diagnosed worldwide annually [5]. Although there are various therapeutic strategies available for HCC, including surgery resection, liver transplantation,

chemotherapy and radiotherapy, the 5-year survival rate of HCC patients is still low until now, due to high recurrence and metastasis [6–8]. Therefore, it is necessary to explore molecular mechanism of HCC development and progression to form more efficient therapeutic approaches for this disease.

MicroRNAs (MiRNAs) is a class of small non-coding RNAs containing 20–25 nucleotides, and they can bind to 3' untranslated region (3'UTR) of target mRNAs to regulate gene transcription and translation [9]. They

have been proven to participate in human tumor pathogenesis, possibly being biomarkers for tumor diagnosis and prognosis [10, 11]. Growing evidences have demonstrated that miRNAs could regulate the proliferation, differentiation, apoptosis, invasion and metastasis of cancer cells, including in HCC [12, 13]. *Mir-125b* is an important member in miRNA family, and its abnormal expression is observed in various tumors [14, 15]. In HCC, the expression of *mir-125b* was down-regulated and its enhanced expression was proven to inhibit the growth, proliferation, invasion and metastasis of liver cancer cells [16, 17]. *Mir-125b* might be involved in HCC progression. However, potential mechanism of *mir-125b* influencing HCC progression is still unclear.

PI3K/AKT/GSK3 $\beta$  signaling pathway is reported to be involved in the development and progression of various tumors [18, 19], and its activation can upregulate the expressions of downstream oncogenes to promote the proliferation, invasion and metastasis of tumor cells [20]. It has been reported that *mir-125b* can regulate cancer progression through PI3K/AKT/GSK3 $\beta$  pathway by targeting multiple mRNAs [21]. However, whether *mir-125b* regulates HCC progression via PI3K/AKT/GSK3 $\beta$  pathway remains unknown.

In the present study, we investigated the expression of *mir-125b* in HCC tissues and cells. Cell experiments were carried out to explore the roles of *mir-125b* in HCC progression, and its influence on PI3K/AKT/GSK3 $\beta$  signaling pathway in the disease. In addition, bioinformatic analysis and luciferase report assay were performed to explore potential targets of *mir-125b* in HCC.

## RESULTS

### *Mir-125b* significantly down-regulated in HCC tissues and cells

QRT-PCR results showed that compared with adjacent normal tissues and L02 cells, *mir-125b* level was significantly lowered in HCC tissues and HCC cells SK-Hep-1, HepG2 and Huh7 ( $P<0.05$ , Figure 1A, 1B). In HCC cells, *mir-125b* level was highest in Huh7, followed by SK-Hep-1 cells, and lowest in HepG2 cells. So in subsequent research, HepG2 cells were selected.

### Association of *mir-125b* level with clinical characteristics of HCC patients

According to their mean expression level of *mir-125b* in tumor tissues, 98 HCC patients were divided into two groups: low ( $n=40$ ) and high ( $n=58$ ) expression groups. Analysis results showed that *mir-125b* level was negatively associated with lymphatic metastasis (Table 1,  $P=0.013$ ) and TNM stage ( $P=0.024$ ). However, the expression level of *mir-125b* was not significantly correlated with age, gender, smoking status or tumor size in HCC patients ( $P>0.05$ ).

### *mir-125b* significantly inhibited the proliferation of HCC cells

Transfection efficiency was evaluated via qRT-PCR and the result showed that relative expression level of *mir-125b* was obviously higher in HepG2 cells transfected by *mir-125b* mimics than in mimic-NC group ( $P<0.05$ , Figure 2A). MTT analysis showed that proliferation was significantly decreased among HCC cells transfected by

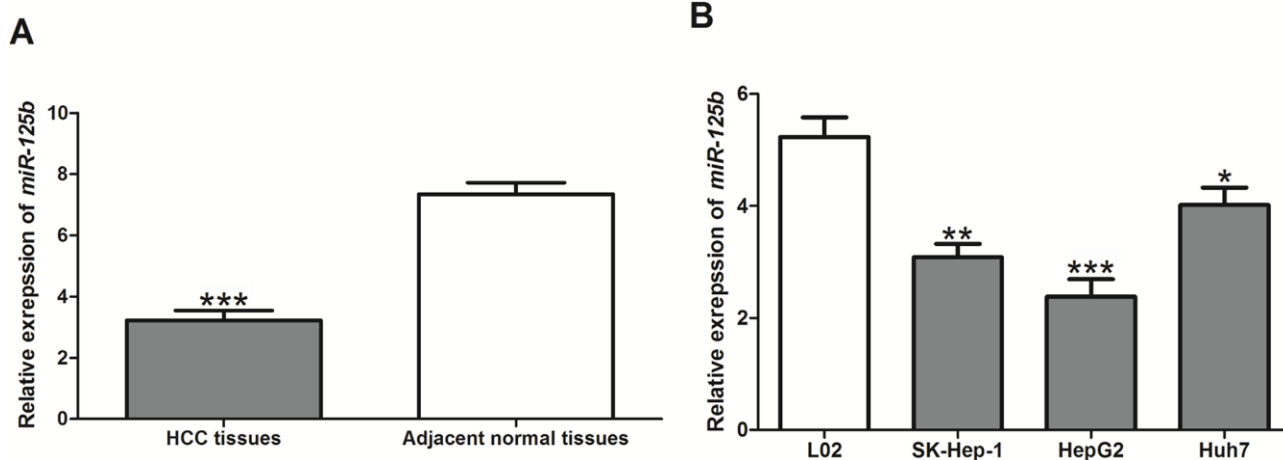

**Figure 1. Relative expression level of *mir-125b* in HCC tissues and cells.** (A) The expression level of *mir-125b* in HCC tissues and adjacent normal ones; (B) The expression level of *mir-125b* among HCC cells SK-Hep-1, HepG2 and Huh7 and human normal hepatocytes L02. \* $P<0.05$ , \*\* $P<0.01$  and \*\*\* $P<0.001$  indicated significant difference between compared two groups.

**Table 1. The association of *miR-125b* expression level with the clinical characteristics of HCC patients.**

| Characteristics      | N=98 | Low expression (n=40) | High expression (n=58) | P     |
|----------------------|------|-----------------------|------------------------|-------|
| Age (years)          |      |                       |                        | 0.360 |
| $\geq 60$            | 46   | 21                    | 25                     |       |
| $< 60$               | 52   | 19                    | 33                     |       |
| Gender               |      |                       |                        | 0.681 |
| Men                  | 66   | 26                    | 40                     |       |
| Women                | 32   | 14                    | 18                     |       |
| Smoking              |      |                       |                        | 0.109 |
| Yes                  | 56   | 19                    | 37                     |       |
| No                   | 42   | 21                    | 21                     |       |
| Tumor size (cm)      |      |                       |                        | 0.987 |
| $\leq 3$             | 54   | 22                    | 32                     |       |
| $> 3$                | 44   | 18                    | 26                     |       |
| Lymphatic metastasis |      |                       |                        | 0.013 |
| Yes                  | 44   | 24                    | 20                     |       |
| No                   | 54   | 16                    | 38                     |       |
| TNM stage            |      |                       |                        | 0.024 |
| I-II                 | 62   | 20                    | 42                     |       |
| III-IV               | 36   | 20                    | 16                     |       |

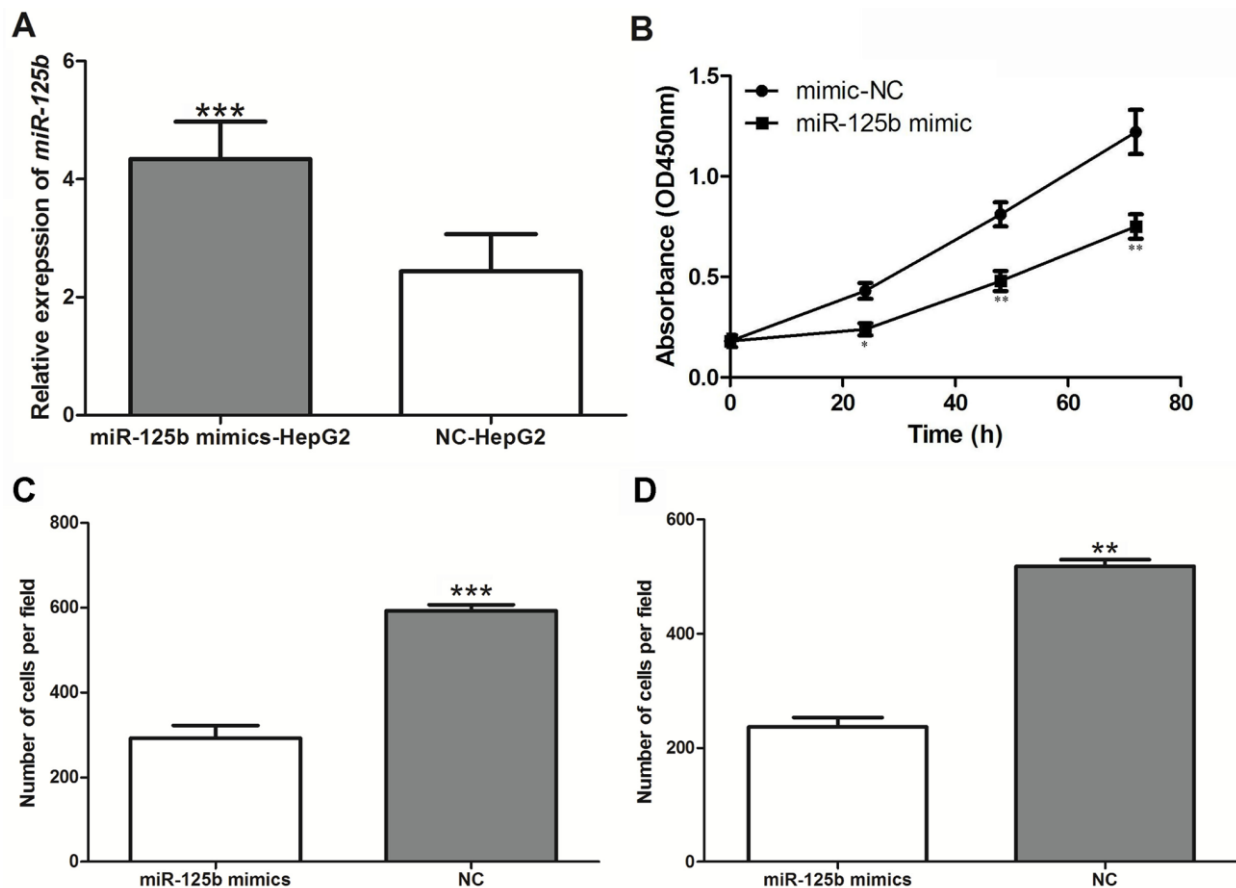

**Figure 2. The effects of *miR-125b* expression on biological behaviour of HepG2 cells. (A)** Relative expression level of *miR-125b* in HepG2 cells transfected by *miR-125b* mimics and NC. **(B)** The effects of *miR-125b* expression level on the proliferation of HepG2 cells. **(C)** The influences of *miR-125b* mimics on the migration of HCC cells. **(D)** The influences of *miR-125b* mimics on the invasion of HCC cells. \* $P < 0.05$ , \*\* $P < 0.01$  and \*\*\* $P < 0.001$  indicated significant difference between compared two groups.

*miR-125b* mimics, compared with NC group ( $P<0.05$ , Figure 2B).

### ***MiR-125b* influenced the migration and invasion of HCC cells**

Compared with NC group, the number of migrating cells was significantly lowered in *miR-125b* mimics transfection group ( $P<0.001$ , Figure 2C). Likewise, the

number of invasive cells in *miR-125b* mimics transfection group was also significantly lower than that in NC group ( $P<0.01$ , Figure 2D).

### ***MiR-12b* targeted PIK3CD in HCC cells**

Bioinformatic analysis demonstrated that *miR-125b* might bind to the 3'UTR of PIK3CD (Figure 3A). PIK3CD might be a potential target of *miR-125b* in HCC

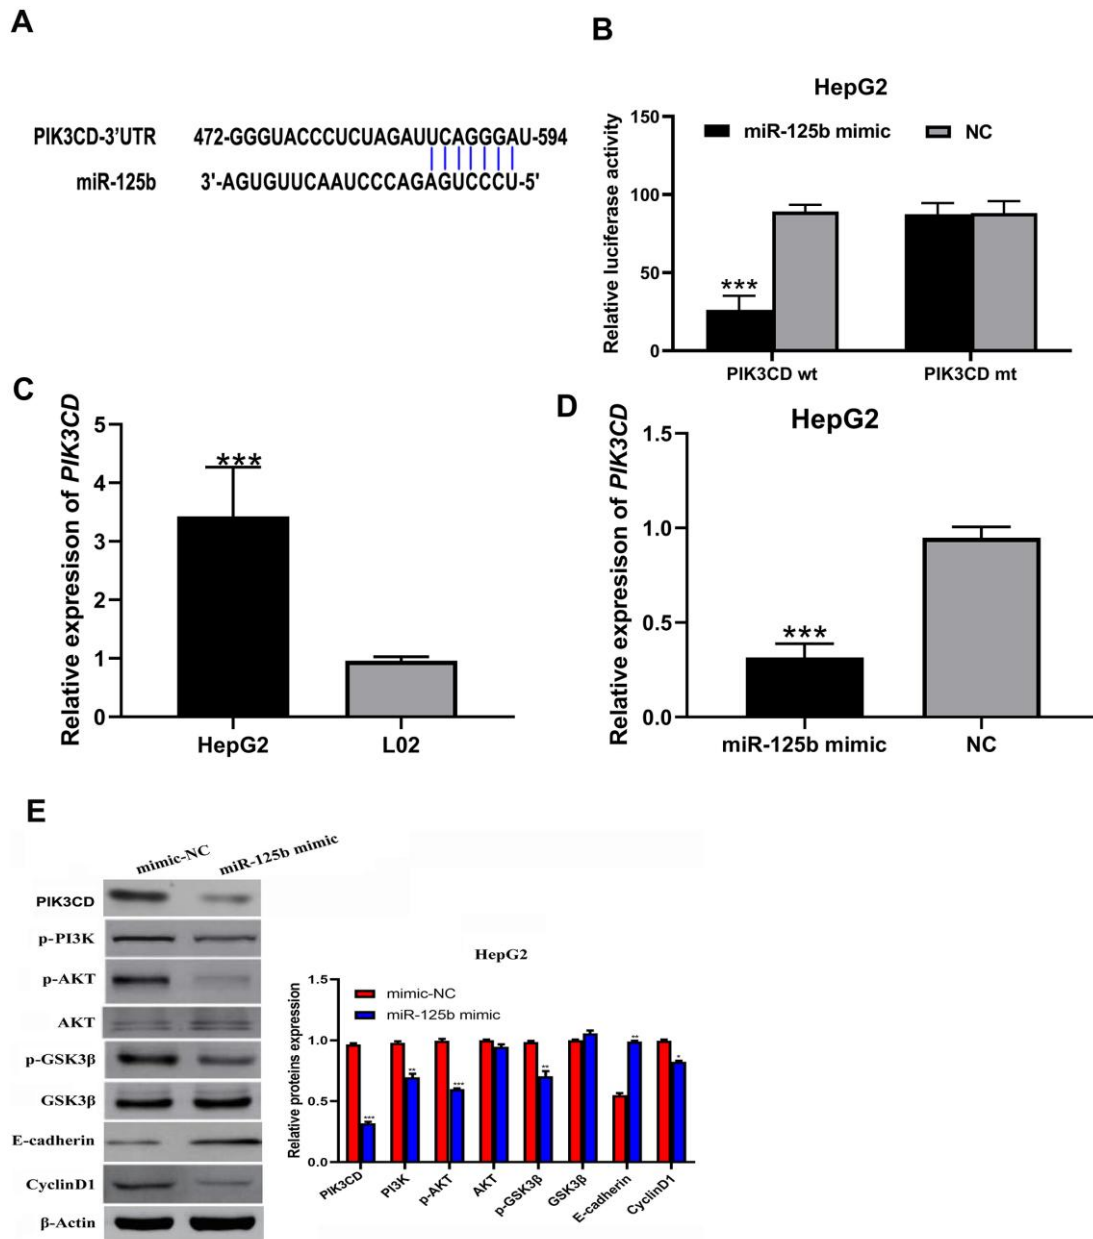

**Figure 3. *MiR-125b* regulated PI3K/AKT/GSK3β pathway through targeting PIK3CD.** (A) Bioinformatic analysis showed that *miR-125b* could bind to the 3'UTR of PIK3CD. (B) Dual luciferase assay revealed a targeted relationship between *miR-125b* and PIK3CD. (C) The expression of PIK3CD mRNA was significantly up-regulated in HepG2 cells compared to normal liver cell line L02. (D) Moreover, enhanced expression of *miR-125b* led to the downregulation of PIK3CD. (E) The expressions of PI3K/AKT/GSK3β signaling pathway-related proteins PI3K, AKT, p-AKT, p-GSK3β, GSK3β and CyclinD1 in HepG2 cells. \*  $P<0.01$  indicated significant difference between compared two groups.

cells. Dual luciferase assay was performed to investigate the targeted relationship. As shown in Figure 3B, co-transfection by *miR-125b* mimic and PIK3CD mt could significantly suppress luciferase activity ( $P<0.001$ ), revealing the targeted association of *miR-125b* with PIK3CD (Figure 3B). QRT-PCR analysis suggested that the expression of PIK3CD mRNA was significantly increased in HepG2 cells, compared to normal liver cell line L02 (Figure 3C). Moreover, enhanced expression of *miR-125b* in HepG2 cells resulted in the down-regulation of PIK3CD (Figure 3D). All the results revealed that PIK3CD might be a potential target of *miR-125b* in HCC.

#### ***MiR-125b* regulated PI3K/AKT/GSK3 $\beta$ signaling pathway in HCC cells**

Western bolt showed that PIK3CD, p-PI3K, p-AKT, p-GSK3 $\beta$  and CyclinD1 expression levels were

significantly down-regulated in HCC cells transfected by *miR-125b* mimics, compared with NC group. On the contrary, E-cadherin protein level was significantly increased ( $P<0.01$ , Figure 3E).

#### ***MiR-125b* regulated the proliferation, migration and invasion of HCC cells through PI3K/AKT/GSK3 $\beta$ pathway mediated by PIK3CD**

To explore the mechanism of *miR-125b* functioning in HCC progression, HepG2 cells were co-transfected by *miR-125b* mimic and PIK3CD over-expression vector. According to Western blot analysis, the over-expression of PIK3CD could enhance the expressions of p-AKT and p-GSK3 $\beta$  and reduce E-cadherin expression, revealing the activation of PI3K/AKT/GSK3 $\beta$  pathway in HepG2 cells (Figure 4A). Moreover, the proliferation, migration and invasion of HepG2 cells transfected by *miR-125b* mimic were distinctly promoted by

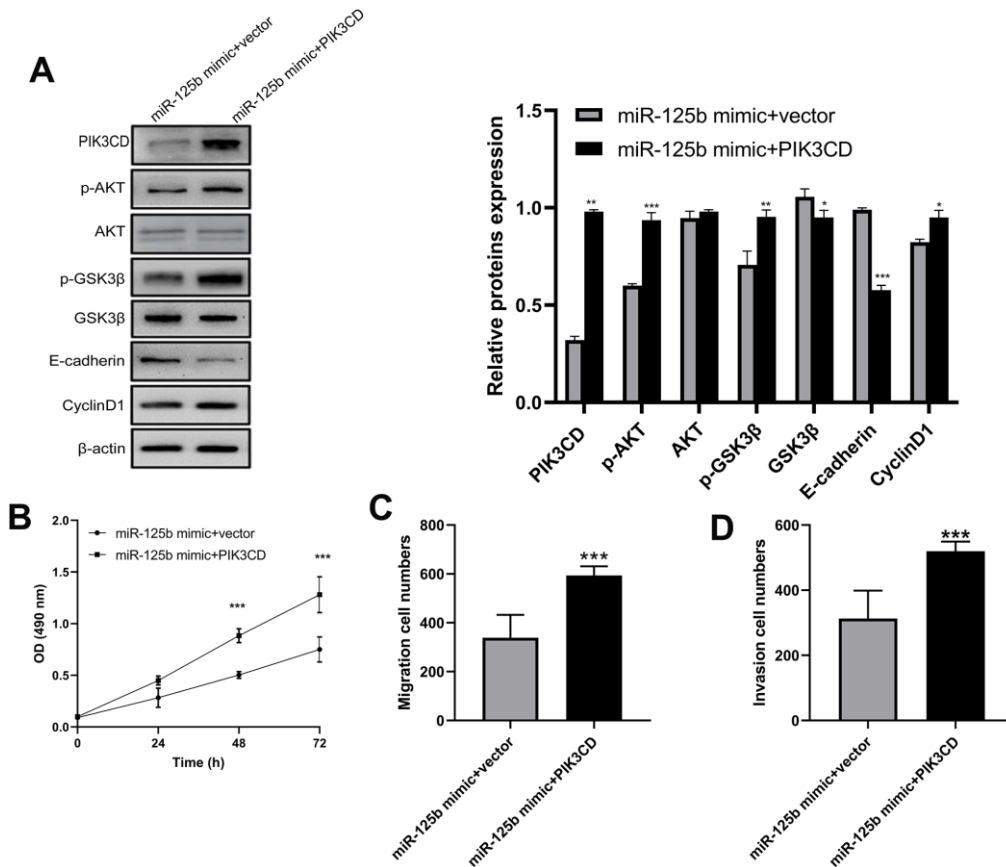

**Figure 4. *MiR-125b* regulated the proliferation, migration and invasion of HCC cells through PI3K/AKT/GSK3 $\beta$  pathway mediated by PIK3CD.** (A) Expression levels of PI3K/AKT/GSK3 $\beta$  pathway-related proteins AKT, p-AKT, p-GSK3 $\beta$ , GSK3 $\beta$  and CyclinD1 in HepG2 cells transfected by *miR-125b* mimic+vector and *miR-125b* mimic+PIK3CD. (B) The proliferation of HepG2 cells, inhibitory effect of *miR-125b* mimics on cell proliferation was significantly neutralized by overexpressed PIK3CD. (C) The migration of HepG2 cells, inhibitory effect of *miR-125b* mimics on cell proliferation was significantly neutralized by overexpressed PIK3CD. (D) The invasion of HepG2 cells, inhibitory effect of *miR-125b* mimics on cell proliferation was significantly neutralized by overexpressed PIK3CD. \* $P<0.05$ , \*\* $P<0.01$  and \*\*\* $P<0.001$  indicated significant difference between compared two groups.

overexpressed PIK3CD (Figure 4B–4D). All the data suggested that PIK3CD could neutralize anti-tumor action of *miR-125b* in HCC.

### ***miR-125b* mimics inhibited the progression of HCC cells *in vivo***

In *In vivo* experiment, *miR-125b* expression level was significantly upregulated in nude mice after *miR-125b* mimic injection ( $P<0.01$ , Figure 5A). Moreover, enhanced expression of *miR-125b* could significantly reduce tumor volume and weight ( $P<0.05$ ), compared with mimic-NC group (Figure 5B, 5C). Similar tumor volume curves between these two groups might be caused by small sample size of the mice.

## **DISCUSSION**

HCC is a malignant tumor with high morbidity and mortality, and seriously threatens human healthy worldwide [4]. Despite great progressions in treatments,

clinical outcomes of HCC patients are still unsatisfactory, due to metastasis and relapse [22, 23]. To improve the prognosis of HCC patients, various researches have been devoted to explore molecular etiology of the disease, which may contribute to target therapy. Growing evidence has demonstrated that miRNAs play important roles in both physiological and pathological conditions [24]. Given their regulatory effects on gene expression, miRNAs are involved in various human cancers, such as HCC [25]. In the current study, we investigated functional roles of *miR-125b* in HCC progression, as well as relevant molecular mechanisms. We found that the down-regulation of *miR-125b* could promote the progression of HCC through PI3K/AKT/GSK3 $\beta$  signaling pathway.

*MiR-125b* belongs to miRNA-125 family, a highly conserved group throughout evolution [26]. Alterations in *miR-125b* expression are significantly correlated with tumorigenesis and tumor progression. For example, Jin et al. reported that the up-regulation of *miR-125b* showed

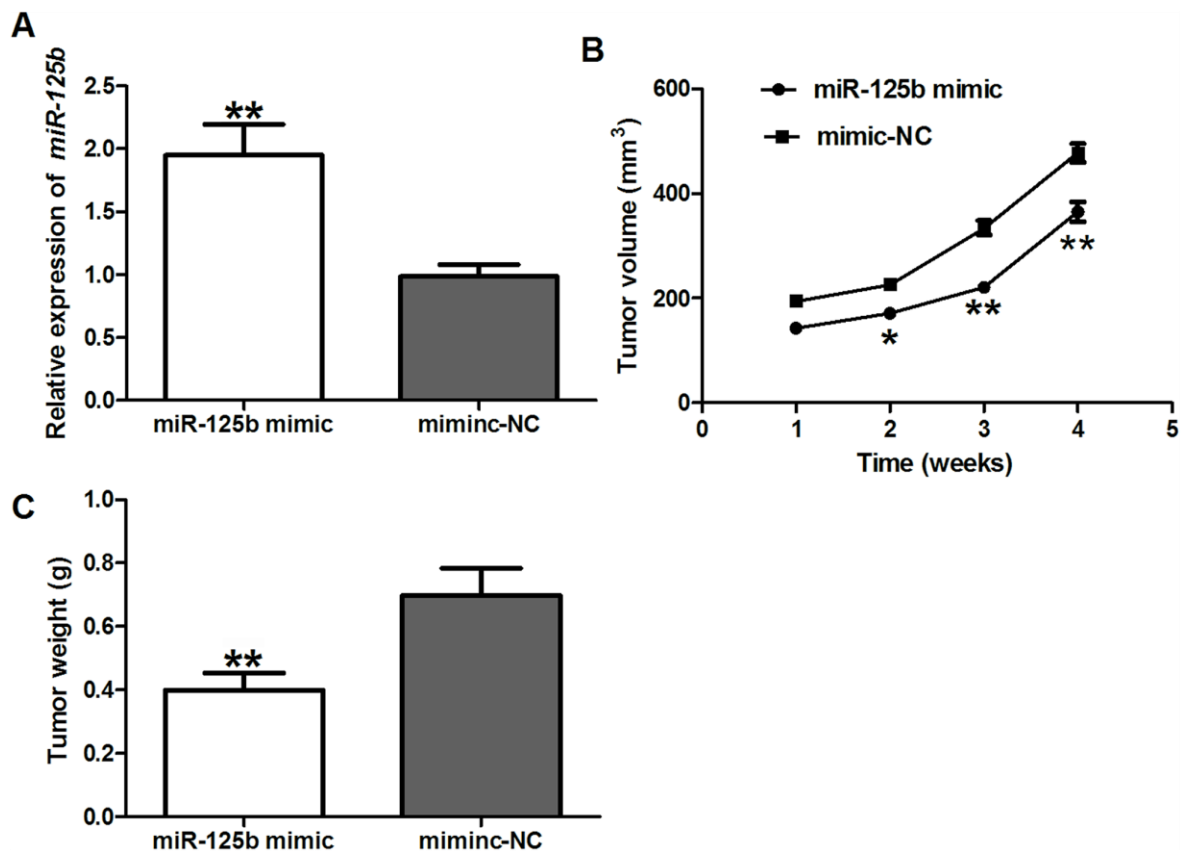

**Figure 5. *miR-125b* mimics inhibited the progression of HCC cells *in vivo*.** (A) In nude mice, the expression level of *miR-125b* was significantly upregulated in *miR-125b* mimic group, compared with mimic-NC group; (B) Tumor volume was significantly decreased in nude mice with *miR-125b* mimics. Initially, tumor volumes in *miR-125b* mimic and mimic-NC groups were  $187.5\pm7.6$  mm<sup>3</sup> and  $194.6\pm8.4$  mm<sup>3</sup>, respectively.; (C) Tumor weight was also obviously lower in *miR-125b* mimic group than in mimic-NC group. \* $P<0.05$ , \*\* $P<0.01$  and \*\*\* $P<0.001$  indicated significant difference between compared two groups.



positive correlation with malignant behaviors of renal cell carcinoma cells *in vitro* [27]. In chondrosarcoma, *miR-125b* might serve as a tumor suppressor to enhance chemotherapy sensitivity [28]. Such evidence reveals distinct roles of *miR-125b* in different cancers. In the current study, we found that the expression of *miR-125b* exhibited a decreasing trend in HCC tissues and cell lines. Moreover, the down-regulation of *miR-125b* was obviously correlated with positive lymph node metastasis and advanced TNM stage. *miR-125b* mimics transfection could significantly inhibit HCC cell proliferation, migration and invasion. All these data suggested that *miR-125b* might be a tumor suppressor against HCC, repressing malignant development and progression. Moreover, *in vivo* experiments demonstrated that enhanced expression of *miR-125b* could obviously suppress tumor growth in HCC. The conclusions were in consistent with those from published articles. Xu et al. reported that the expression of *miR-125b* was obviously decreased in HCC mouse model [29]. Furthermore, the down-regulation of *miR-125b* might contribute to tumor progression and poor survival [30, 31]. In a word, *miR-125b* exerts an anti-tumor effect against HCC progression.

In addition, we also investigated molecular mechanisms of *miR-125b* influencing the progression of HCC. Bioinformatic analysis and luciferase report assay confirmed that PIK3CD might be a potential target of *miR-125b* in HCC. Moreover, the expression of PIK3CD was negatively regulated by *miR-125b*. Anti-tumor action induced by *miR-125b* in HCC could be neutralized by PIK3CD. All the results suggested a targeted relationship between *miR-125b* and PIK3CD in HCC. In addition to HCC, targeted relationship between *miR-125b* and PIK3CD was also reported in anaplastic thyroid cancer [32], cervical cancer [33] and Ewing's sarcoma [34]. We found that expression levels of p-PI3K, p-AKT, p-GSK3 $\beta$  and CyclinD1 proteins in PI3K/AKT/GSK3 $\beta$  pathway were distinctly reduced in *miR-125b* mimics group compared to NC group, while E-cadherin protein was up-regulated. All the results suggested that *miR-125b* could regulate PI3K/AKT/GSK3 $\beta$  pathway through targeting PIK3CD. Other studies also showed similar results. Xiao et al. found that PI3K/AKT/GSK3 $\beta$  pathway was significantly associated with the development of HCC, and that CyclinD1, p-AKT and p-GSK3 $\beta$  were significantly reduced by *miR-218* over-expression in HCC [35]. Besides, Li and colleagues indicated that overexpressed *miR-125b* could significantly restrain p-AKT level [36]. However, Wang and coworkers suggested that down-regulated *miR-125b* inhibited the expression of p-Akt in non-small cell lung cancer (NSCLC) [21]. Such difference might be caused by different mechanisms across tumors.

Several limitations in the current study should be stated. Firstly, the sample size was relatively small that might reduce statistical power of our findings. Secondly, only one HCC cell line was used in *in vitro* experiments. Due to heterogeneity between HCC cell lines, our findings required further verification in other HCC cell lines. Thirdly, in addition to PIK3CD, several specific targets have been proposed for *miR-125b*, such as SIRT6 [37], and SIRT6 could also regulate PI3K signaling pathway [38]. Whether *miR-125b* influences the progression of HCC through PI3K/AKT mediated by SIRT6 should be explored in further studies. Moreover, in *in vivo* experiment, we only explored the influence of *miR-125b* expression level on growing ability of HCC, but detailed molecular mechanism was not discussed. Additionally, HCC is a complex disease regulated by multiple factors, but the interaction of *miR-125b* with other genes or signaling pathways was not investigated in the current study. Further well-designed studies should be carried out to verify and improve our conclusions.

In conclusion, *miR-125b* is significantly decreased in HCC tissues and cells, and may inhibit the proliferation, migration and invasion of HCC cells via suppressing PI3K/AKT/GSK3 $\beta$  signaling pathway by targeting PIK3CD.

## MATERIALS AND METHODS

### Tissue samples

A total of 98 HCC patients were recruited from The Fifth Medical Center of PLA General Hospital. Tumor tissues and corresponding adjacent normal ones (4cm away from tumor tissue) were collected from the patients in surgery. Tissue samples were immediately put into liquid nitrogen, and then stored in a -80° C refrigerator. Patients did not receive radiotherapy or chemotherapy before surgery. This study was supported by the Ethics Committee of The Fifth Medical Center of PLA General Hospital. All subjects signed written informed consents before tissue collection. Meanwhile, clinical information of HCC patients was also collected from their medical records.

### Cell culture

HCC cell lines SK-Hep-1, HepG2 and Huh7, and human fetal liver cell line L02 were purchased from the Institute of Biochemistry and Cell Biology; Chinese Academy of Sciences (Shanghai, China). Cells were cultured in RPMI-1640 (GE Healthcare Life Sciences, Little Chalfont, UK) or DMEM (Invitrogen, Carlsbad, CA) media supplemented with 10% fetal bovine serum (FBS). The culture was conducted in a humid atmosphere

containing 5% CO<sub>2</sub> at 37° C for passage. Nutrient solution was replaced every three days.

### Cell transfection

*miR-125b* mimics, negative control (NC), overexpressed vector (specific to PIK3CD) and empty vector were designed for cell experiments. Cell transfection was performed using Lipofectamine 2000 (Invitrogen, CA, USA) according to the manufacturer's protocol. Culture was proceeded at 37° C with 5% CO<sub>2</sub> for 48h. Then *miR-125b* expression in transfected cells was detected through quantitative real-time polymerase chain reaction (qRT-PCR).

### RNA extraction and qRT-PCR

Total RNA in tissues and cells was extracted via Trizol method (TaKaRa, Japan) and reversely transcribed into the first chain of cDNA using QuantiTect Reverse Transcription Kit (Qiagen, Germany) following the manufacturer's instruction. Power SYBR Green PCR Master Mix (Applied Biosystems, Carlsbad, CA, USA) was used for PCR amplification and the reaction was performed in Applied Biosystems AB7500 Real Time PCR system (Applied, Biosystems). Relative expression of *miR-125b* was analyzed using the comparative cycle threshold method ( $2^{-\Delta\Delta CT}$ ), and *U6* was used as an internal normalized reference. Tests were repeated three times.

### MTT proliferation assay

Cell proliferation was measured through MTT method following standardized protocol (Roche). After transfection, HCC cells were inoculated in 96-well plates and their density was adjusted to  $2 \times 10^4$ /well. All groups were incubated for 24, 48 and 72h. 50μl MTT reagent (5mg/mL) was added into every well, and then underwent 37° C incubation for 4h. Proliferation ability of cells was determined using MTT cell proliferation kit (Cayman Chemical) following relevant instruction. MTT enzyme-linked immunometric meter was used to measure OD value (450nm).

### Migration and invasion detection

The migration and invasion of HCC cells were detected employing Transwell trial. Transwell chambers were pre-coated by matrigel (BD Biosciences), and 50μl serum-free medium with BSA (bull serum albumin) was added to the upper compartment for 2h of dehydration at 37° C. Then 200μl cell suspension was added to the upper chamber while 500μl DMEM media containing 10% FBS was added to the lower chamber. Cells were incubated for 24h at 37° C with 5% CO<sub>2</sub>. Invasive cells

were stained with 0.1% crystal violet for 30 min. Under a microscope the cells in ten random sights were counted.

Uncoated matrigel Transwell trial was used to test the migration of HCC cells.

### Western blot analysis

Transfected cells were lysed using RIPA buffer (Thermo Scientific, Belmont, MA, USA) for 30 min at 4° C. Protein in cells was extracted and separated using 10% SDS-polyacrylamide gel electrophoresis (SDS-PAGE), and transferred onto a PVDF membrane (Roche) through electroblotting. PVDF membrane was blocked by nonfat milk at room temperature for 24h or at 4° C overnight. It was incubated at 4° C overnight by primary antibodies (1:1000), including anti-PIK3CD, anti-PI3K, anti-p-PI3K, anti-Akt, anti-p-Akt, anti-GSK3β, anti-E-cadherin, anti-Cyclin D1 and anti-β-actin. Then the membrane was incubated for 1.5h at room temperature with secondary antibody (1:2000, Abcam, China). The target band of protein was shown using ECL Western blotting kit (Millipore, Boston, MA, USA).

### Dual Luciferase assay

For luciferase report assay, mutant PIK3CD 3'UTR (mt) and wide PIK3CD 3'UTR (wt) were amplified and cloned to luciferase expression vector pGL-3-ector (Promega, San Luis, CA, USA). Cells were seeded on 6-well plates ( $1 \times 10^5$  cells per well), and then co-transfected by either wt or mt, in combination with *miR-125b* mimic or NC using Lipofectamine 2000. The transfected cells were incubated at 37° C with 5% CO<sub>2</sub> for 48 hours. Then, the cells were harvested, and their firefly and renilla luciferase activities were estimated adopting Dual-Luciferase Reporter Assay (Promega) kit according to the guidance of the manufacturer. Relative luciferase activity was expressed by the ratio of Firely/Renilla. Each test was repeated three times.

### In vivo experiments

In this study, Balb/c nude mice were used for *in vivo* experiment. 20 Bal b/c nude mice (5-8 weeks, 18-20g) were purchased from SLRC Laboratory Animal Center (Shanghai, China), and HepG2 cells ( $3 \times 10^6$ /200μl) were inoculated at the upper part of the groin of the mice. The mice were randomly divided into experimental (*miR-125b* mimic) and control (mimic-NC) groups. The major axis (a) and minor axis (b) of subcutaneous tumors were measured once a week, and formula calculating tumor volume was as follows:  $V = 1/2 \times a \times b^2$ . After 4 weeks, nude mice were sacrificed for the measuring of their tumor weights.



## Statistics analysis

In this study, SPSS 18.0 (SPSS Inc., Chicago, IL, USA) and GraphPad Prism (GraphPad, San Diego, CA, USA) were used for statistics analysis and graph construction, respectively. All experiments were repeated in triplicate and continuous data were shown in mean±SD (standard deviation). Difference between groups was compared through two-tailed Student's t-test (for continuous variables) or  $\chi^2$  test (for categorical variables).  $P<0.05$  was considered to be significant threshold.

## AUTHOR CONTRIBUTIONS

H.C., X.J., L.M., H.L., X.Z. conceived and designed the experiments, analyzed the data, and wrote the paper. YY.Z., X.N., Y.Z., Y.G., Z.Z. performed the experiments. All authors read and approved the final manuscript.

## CONFLICTS OF INTEREST

The authors declare that they have no conflicts of interest.

## REFERENCES

1. Bray F, Ren JS, Masuyer E, Ferlay J. Global estimates of cancer prevalence for 27 sites in the adult population in 2008. *Int J Cancer*. 2013; 132:1133–45.  
<https://doi.org/10.1002/ijc.27711> PMID:22752881
2. El-Serag HB. Epidemiology of viral hepatitis and hepatocellular carcinoma. *Gastroenterology*. 2012; 142:1264–73.e1.  
<https://doi.org/10.1053/j.gastro.2011.12.061> PMID:22537432
3. El-Serag HB. Hepatocellular carcinoma. *N Engl J Med*. 2011; 365:1118–27.  
<https://doi.org/10.1056/NEJMra1001683> PMID:21992124
4. Torre LA, Bray F, Siegel RL, Ferlay J, Lortet-Tieulent J, Jemal A. Global cancer statistics, 2012. *CA Cancer J Clin*. 2015; 65:87–108.  
<https://doi.org/10.3322/caac.21262> PMID:25651787
5. Siegel RL, Miller KD, Jemal A. Cancer statistics, 2015. *CA Cancer J Clin*. 2015; 65:5–29.  
<https://doi.org/10.3322/caac.21254> PMID:25559415
6. Bosetti C, Turati F, La Vecchia C. Hepatocellular carcinoma epidemiology. *Best Pract Res Clin Gastroenterol*. 2014; 28:753–70.  
<https://doi.org/10.1016/j.bpg.2014.08.007> PMID:25260306
7. Miller KD, Siegel RL, Lin CC, Mariotto AB, Kramer JL, Rowland JH, Stein KD, Alteri R, Jemal A. Cancer treatment and survivorship statistics, 2016. *CA Cancer J Clin*. 2016; 66:271–89.  
<https://doi.org/10.3322/caac.21349> PMID:27253694
8. Díaz-González Á, Reig M, Bruix J. Treatment of hepatocellular carcinoma. *Dig Dis*. 2016; 34:597–602.  
<https://doi.org/10.1159/000445275> PMID:27332893
9. Chen Z, Zuo X, Zhang Y, Han G, Zhang L, Wu J, Wang X. MiR-3662 suppresses hepatocellular carcinoma growth through inhibition of HIF-1 $\alpha$ -mediated warburg effect. *Cell Death Dis*. 2018; 9:549.  
<https://doi.org/10.1038/s41419-018-0616-8> PMID:29748591
10. Kong YW, Ferland-McCollough D, Jackson TJ, Bushell M. microRNAs in cancer management. *Lancet Oncol*. 2012; 13:e249–58.  
[https://doi.org/10.1016/S1470-2045\(12\)70073-6](https://doi.org/10.1016/S1470-2045(12)70073-6) PMID:22652233
11. Giordano S, Columbano A. MicroRNAs: new tools for diagnosis, prognosis, and therapy in hepatocellular carcinoma? *Hepatology*. 2013; 57:840–47.  
<https://doi.org/10.1002/hep.26095> PMID:23081718
12. Yang J, Sheng YY, Wei JW, Gao XM, Zhu Y, Jia HL, Dong QZ, Qin LX. MicroRNA-219-5p promotes tumor growth and metastasis of hepatocellular carcinoma by regulating cadherin 1. *Biomed Res Int*. 2018; 2018:4793971.  
<https://doi.org/10.1155/2018/4793971> PMID:29862272
13. Hayes CN, Chayama K. MicroRNAs as biomarkers for liver disease and hepatocellular carcinoma. *Int J Mol Sci*. 2016; 17:280.  
<https://doi.org/10.3390/ijms17030280> PMID:26927063
14. Glud M, Rossing M, Hother C, Holst L, Hastrup N, Nielsen FC, Gniadecki R, Drzewiecki KT. Downregulation of miR-125b in metastatic cutaneous Malignant melanoma. *Melanoma Res*. 2010; 20:479–84.  
<https://doi.org/10.1097/CMR.0b013e32833e32a1> PMID:20827223
15. Xu N, Brodin P, Wei T, Meisgen F, Eidsmo L, Nagy N, Kemeny L, Stähle M, Sonkoly E, Pivarcsi A. MiR-125b, a microRNA downregulated in psoriasis, modulates keratinocyte proliferation by targeting FGFR2. *J Invest Dermatol*. 2011; 131:1521–29.  
<https://doi.org/10.1038/ijid.2011.55> PMID:21412257
16. Kim JK, Noh JH, Jung KH, Eun JW, Bae HJ, Kim MG, Chang YG, Shen Q, Park WS, Lee JY, Borlak J, Nam SW. Sirtuin7 oncogenic potential in human hepatocellular carcinoma and its regulation by the tumor suppressors

- MiR-125a-5p and MiR-125b. *Hepatology*. 2013; 57:1055–67.  
<https://doi.org/10.1002/hep.26101> PMID:[23079745](#)
17. Liang L, Wong CM, Ying Q, Fan DN, Huang S, Ding J, Yao J, Yan M, Li J, Yao M, Ng IO, He X. MicroRNA-125b suppressed human liver cancer cell proliferation and metastasis by directly targeting oncogene LIN28B2. *Hepatology*. 2010; 52:1731–40.  
<https://doi.org/10.1002/hep.23904> PMID:[20827722](#)
  18. Dai J, Qian C, Su M, Chen M, Chen J. Gastrokine-2 suppresses epithelial mesenchymal transition through PI3K/AKT/GSK3 $\beta$  signaling in gastric cancer. *Tumour Biol*. 2016; 37:12403–10.  
<https://doi.org/10.1007/s13277-016-5107-x> PMID:[27323966](#)
  19. Yamaguchi K, Lee SH, Eling TE, Baek SJ. Identification of nonsteroidal anti-inflammatory drug-activated gene (NAG-1) as a novel downstream target of phosphatidylinositol 3-kinase/AKT/GSK-3 $\beta$  pathway. *J Biol Chem*. 2004; 279:49617–23.  
<https://doi.org/10.1074/jbc.M408796200> PMID:[15377673](#)
  20. Jiang H, Zhou Z, Jin S, Xu K, Zhang H, Xu J, Sun Q, Wang J, Xu J. PRMT9 promotes hepatocellular carcinoma invasion and metastasis via activating PI3K/Akt/GSK-3 $\beta$ /snail signaling. *Cancer Sci*. 2018; 109:1414–27.  
<https://doi.org/10.1111/cas.13598> PMID:[29603830](#)
  21. Wang Y, Zhao M, Liu J, Sun Z, Ni J, Liu H. miRNA-125b regulates apoptosis of human non-small cell lung cancer via the PI3K/Akt/GSK3 $\beta$  signaling pathway. *Oncol Rep*. 2017; 38:1715–23.  
<https://doi.org/10.3892/or.2017.5808> PMID:[28713974](#)
  22. Daoudaki M, Fouzas I. Hepatocellular carcinoma. *Wien Med Wochenschr*. 2014; 164:450–55.  
<https://doi.org/10.1007/s10354-014-0296-7> PMID:[25182146](#)
  23. Mazzocchi G, Miele L, Oben J, Grieco A, Vinciguerra M. Biology, epidemiology, clinical aspects of hepatocellular carcinoma and the role of sorafenib. *Curr Drug Targets*. 2016; 17:783–99.  
<https://doi.org/10.2174/1389450117666151209120831> PMID:[26648069](#)
  24. Gargalionis AN, Basdra EK. Insights in microRNAs biology. *Curr Top Med Chem*. 2013; 13:1493–502.  
<https://doi.org/10.2174/15680266113139990098> PMID:[23745801](#)
  25. Song Y, Wang F, Huang Q, Cao Y, Zhao Y, Yang C. MicroRNAs contribute to hepatocellular carcinoma. *Mini Rev Med Chem*. 2015; 15:459–66.  
<https://doi.org/10.2174/1389557515666150324125353> PMID:[25807945](#)
  26. Yin H, Sun Y, Wang X, Park J, Zhang Y, Li M, Yin J, Liu Q, Wei M. Progress on the relationship between miR-125 family and tumorigenesis. *Exp Cell Res*. 2015; 339:252–60.  
<https://doi.org/10.1016/j.yexcr.2015.09.015> PMID:[26407906](#)
  27. Jin L, Zhang Z, Li Y, He T, Hu J, Liu J, Chen M, Gui Y, Chen Y, Lai Y. miR-125b is associated with renal cell carcinoma cell migration, invasion and apoptosis. *Oncol Lett*. 2017; 13:4512–4520.  
<https://doi.org/10.3892/ol.2017.5985> PMID:[28599452](#)
  28. Tang XY, Zheng W, Ding M, Guo KJ, Yuan F, Feng H, Deng B, Sun W, Hou Y, Gao L. miR-125b acts as a tumor suppressor in chondrosarcoma cells by the sensitization to doxorubicin through direct targeting the ErbB2-regulated glucose metabolism. *Drug Des Devel Ther*. 2016; 10:571–83.  
<https://doi.org/10.2147/DDDT.S90530> PMID:[26966351](#)
  29. Xu L, Li T, Ding W, Cao Y, Ge X, Wang Y. Combined seven miRNAs for early hepatocellular carcinoma detection with chronic low-dose exposure to microcystin-LR in mice. *Sci Total Environ*. 2018; 628:271–81.  
<https://doi.org/10.1016/j.scitotenv.2018.02.021> PMID:[29438936](#)
  30. Kong J, Liu X, Li X, Wu J, Wu N, Chen J, Fang F. miR-125/pokemon auto-circuit contributes to the progression of hepatocellular carcinoma. *Tumour Biol*. 2016; 37:511–19.  
<https://doi.org/10.1007/s13277-015-3596-7> PMID:[26227218](#)
  31. Sun X, Zhang S, Ma X. Prognostic value of MicroRNA-125 in various human Malignant neoplasms: a meta-analysis. *Clin Lab*. 2015; 61:1667–74.  
<https://doi.org/10.7754/clin.lab.2015.150408> PMID:[26731991](#)
  32. Bu Q, You F, Pan G, Yuan Q, Cui T, Hao L, Zhang J. MiR-125b inhibits anaplastic thyroid cancer cell migration and invasion by targeting PIK3CD. *Biomed Pharmacother*. 2017; 88:443–48.  
<https://doi.org/10.1016/j.biopha.2016.11.090> PMID:[28122310](#)
  33. Cui F, Li X, Zhu X, Huang L, Huang Y, Mao C, Yan Q, Zhu J, Zhao W, Shi H. MiR-125b inhibits tumor growth and promotes apoptosis of cervical cancer cells by targeting phosphoinositide 3-kinase catalytic subunit delta. *Cell Physiol Biochem*. 2012; 30:1310–8.  
<https://doi.org/10.1159/000343320> PMID:[23160634](#)
  34. Li J, You T, Jing J. MiR-125b inhibits cell biological progression of Ewing's sarcoma by suppressing the

- PI3K/Akt signalling pathway. *Cell Prolif.* 2014; 47:152–60.  
<https://doi.org/10.1111/cpr.12093> PMID:[24517182](#)
35. Xiao ZD, Jiao CY, Huang HT, He LJ, Zhao JJ, Lu ZY, Liu LX. miR-218 modulate hepatocellular carcinoma cell proliferation through PTEN/AKT/PI3K pathway and HoxA10. *Int J Clin Exp Pathol.* 2014; 7:4039–44. PMID:[25120782](#)
  36. Li W, Xie L, He X, Li J, Tu K, Wei L, Wu J, Guo Y, Ma X, Zhang P, Pan Z, Hu X, Zhao Y, et al. Diagnostic and prognostic implications of microRNAs in human hepatocellular carcinoma. *Int J Cancer.* 2008; 123:1616–22.  
<https://doi.org/10.1002/ijc.23693> PMID:[18649363](#)
  37. Song S, Yang Y, Liu M, Liu B, Yang X, Yu M, Qi H, Ren M, Wang Z, Zou J, Li F, Du X, Zhang H, Luo J. MiR-125b attenuates human hepatocellular carcinoma Malignancy through targeting SIRT6. *Am J Cancer Res.* 2018; 8:993–1007. PMID:[30034937](#)
  38. Ioris RM, Galié M, Ramadori G, Anderson JG, Charollais A, Konstantinidou G, Brenachot X, Aras E, Goga A, Ceglia N, Sebastián C, Martinvalet D, Mostoslavsky R, et al. SIRT6 suppresses cancer stem-like capacity in tumors with PI3K activation independently of its deacetylase activity. *Cell Rep.* 2017; 18:1858–68.  
<https://doi.org/10.1016/j.celrep.2017.01.065> PMID:[28228253](#)
